# Supplementary material
Source: publisher figshare collection journal article supplement (https://frontiersin.figshare.com/ndownloader/files/14634725)
Supplement: Supplementary file [file 14634725]

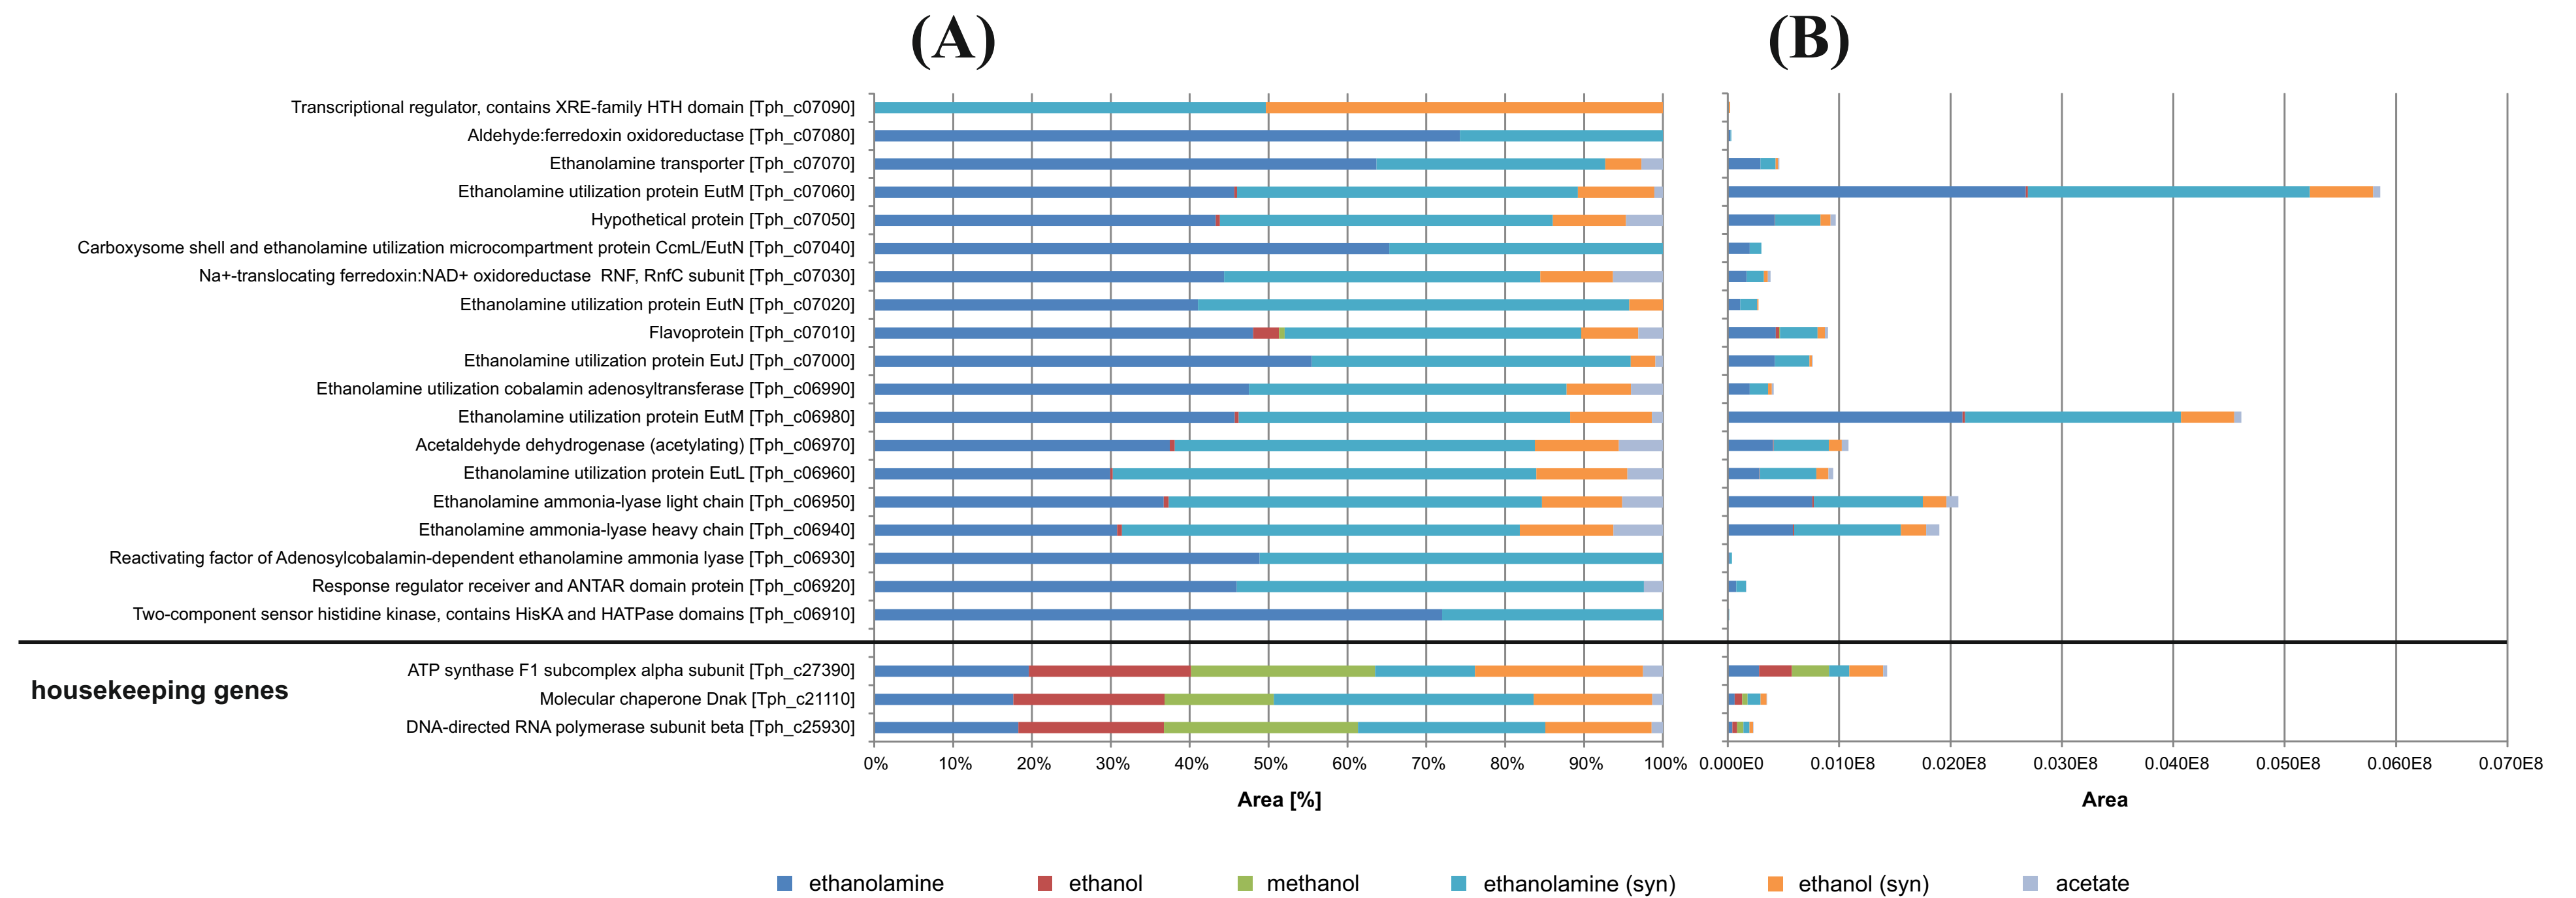

Supplementary Figure 6: Proteome data of the ethanolamine cluster obtained during growth of *Thermacetogenium phaeum* with different substrates. All expressed genes are shown in the graph and housekeeping genes were depicted beneath the solid line. **(A)**: normalized data: percentage of protein abundances (expressed as area of mass spectroscopy signals) under various growth conditions relative to the summed protein abundances (area) of all growth conditions. **(B)**: absolute sums of area values of the respective identified proteins obtained in all growth conditions are shown here.
